# Supplementary material for: Electrochemical decompatibilisation leads to morphology rearrangements in host–guest polymer blend films
Source: Royal Society of Chemistry journal article supplement (doi:10.1039/c6sm00808a), 2016-01-01
Supplement: c6sm00808a1.pdf [file c6sm00808a1.pdf]

**Electronic Supplementary Information for the paper entitled**

**Electrochemical decompatibilisation leads to morphology rearrangements in host-guest polymer blend films**

**Davide Orsi, Andreas E. Früh, Marco Giannetto, Luigi Cristofolini\* and Enrico Dalcanale\***

**DSC analyses.**

For PS and PS-HOST, the samples were heated from 30°C to 150°C (10°C/min as rate), followed by cooling from 150°C to 30°C (rate of 20°C/min), isotherm at 30°C for 3 minutes and another heating until 150°C. For PBMA and PBMA-GUEST, instead, the heating steps are from -30°C to 150°C (10°C/min), cooling from 150°C to -30°C with rate of 20°C/min and isotherm at -30°C for 3 minutes.

In the following table the 2.5% polymers data are compared to the 4% of reference 16:

| <b>Component (Composition Molar Ratio)</b> | <b>T<sub>g</sub> (°C)</b> |
|--------------------------------------------|---------------------------|
| PS                                         | 95                        |
| PS-HOST-4%                                 | 97                        |
| PS-HOST-2.5%                               | 97                        |
| <i>PBMA</i>                                | 26                        |
| PBMA-GUEST-4%                              | 23                        |
| PBMA-GUEST-2.5%                            | 20                        |
| PS / PBMA (1:1)                            | 25/97                     |
| PS-HOST-4/ PBMA-GUEST-4% (1:1)             | 40                        |
| PS-HOST-2.5 / PBMA-GUEST-2.5% (1:1)        | 56                        |

**Table S1.** Polymers and their blends analyzed by differential scanning calorimetry (DSC).

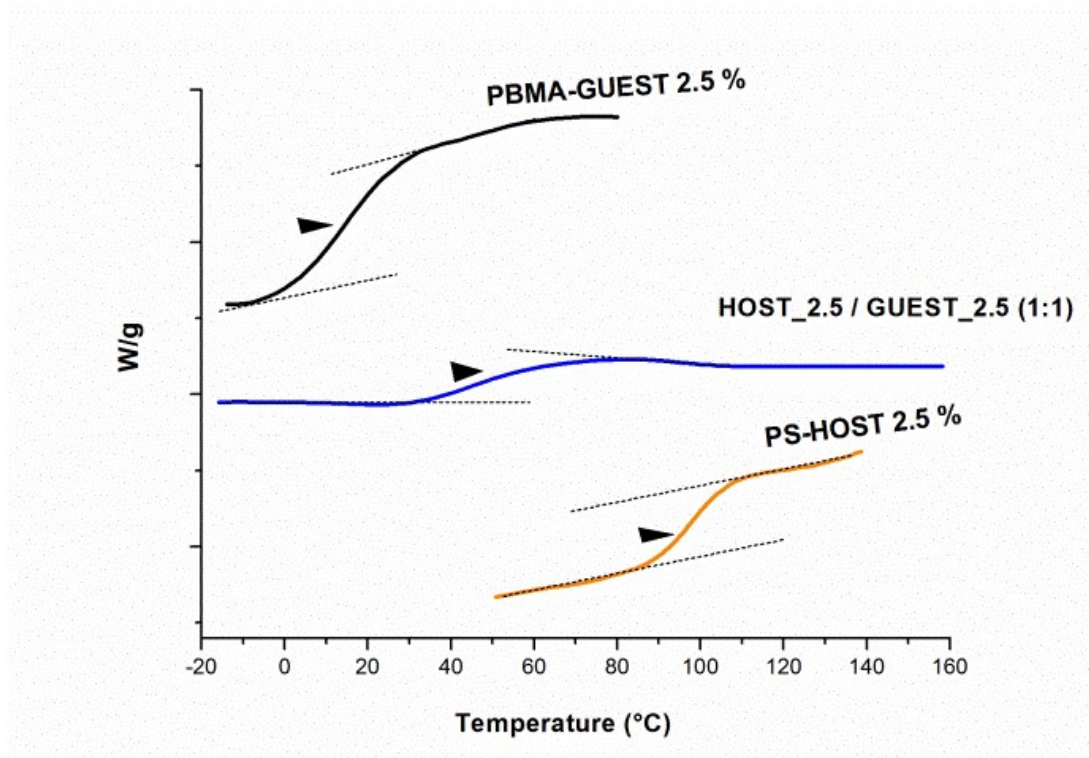

**Figure S1.** 2<sup>nd</sup> heating of DSC thermograms of PBMA-GUEST 2.5% (black line), PS-HOST 2.5% (red line) and their blend (1:1) (blue line).

The 8% HOST/GUEST containing copolymers have comparable T<sub>g</sub> to the 2.5% and 4% ones.
